# Supplementary material for: A Sentinel-2 Machine Learning Dataset for Tree Species Classification in Germany
Source: Copernicus journal article supplement (doi:10.5194/essd-2024-206), 2024-07-04
Supplement: Supplementary file [file essd-2024-206-AC1-supplement.pdf]

# Response to First Review Comments

2024-09-05

Dear Reviewers, Dear Editor,

We would like to thank the editorial team of ESSD for handling our manuscript and the swift replies to requests. Equally, we thank the anonymous reviewers for their critical and constructive questions they have raised with respect to the manuscript "A Sentinel-2 Machine Learning Dataset for Tree Species Classification in Germany". We highly appreciate that you invested your time and effort, which is not self-evident. The valuable comments helped us to improve the manuscript substantially.

Below we have formulated our responses to the individual points raised by the reviewers. The updated manuscripts, as well as a document highlighting the differences have been uploaded.

On behalf of all authors,

Max Freudenberg

## 1 Reviewer 1

### 1.1 Major comments

1. First, the clarity of the general text can be improved. It was not entirely clear to me how the GNNS locations were used, how the exact locations of the individual trees were determined inside the plots and how their crown area was calculated. I was also confused about the coordinates provided in the dataset, called the "Inspire-grid" coordinates, are these the plot centers? I think the clarity could be improved if the authors are more clearly stating what exactly the dataset represents. It is my understanding that the dataset represents plot data of pure stands of tree species and their spectral data from Sentinel-2 and not individual trees, but please correct me if I am wrong!

Response: We indeed extracted reflectances on a single tree level, not aggregated values for pure stands. To address the questions, we improved the explanation how the tree location is measured within the plot (line 85), explained more clearly how the crown area was determined (line 98) and provided additional information on the "inspire grid" is (line 141).

2. Second, I noticed that throughout the text and in the figures and tables, the authors are not using the standard species naming guidelines. It is my understanding that scientific species names should be written in italics with genus name capitalized and the species name not.

Response: We changed all occurrences of botanic species names in text, tables and figures accordingly.

3. Finally, the figures generally look great but the time series- and spectral signature plots (Figure 8 to 11) could be enlarged, there is enough space to enlarge the plots and it would make it easier for the reader to interpret the results. Furthermore, since Figure 8 and 9 depict averages of species, it could be a nice to show some variability around these averages in the form of shading or otherwise.

Response: According to the journal style the final layout will have two columns. For this reason we matched the figure sizes that should appear within one column to the column's width. However, we now slightly enlarged them by trimming white space. We also produced a two-column-wide version of Figure 8, so that the editor can choose what fits the layout best. To visualize the standard deviations of the time series, we added Figure B1 to the appendix and referenced it in the main text.

### 1.2 Minor comments

1. L16 "disturbances" instead of "factors"?

Response: Changed to "disturbances".

2. L33 please shortly explain or define the F1 score.  
 Response: We added a sentence with the definition (harmonic mean between precision and recall) (line 31).
3. L61-L64 please explain how data on 387,775 individual trees and 70,242 non-tree locations result in “75.3 million data points for trees and 13.8 million observations for non-tree background”. Do these numbers refer to the number of images in the time series multiplied by the number of locations? This is presently unclear.  
 Response: We modified the sentence and now state that this number is obtained by multiplying the number of trees and non-tree location with their individual number of observed time steps in the satellite time series (line 62).
4. L64 “51 tree species and species groups” please clarify how many species and how many groups exactly, it could be 2 species and 49 groups, right?  
 Response: We added the clarification that there are 48 species and 3 species groups in the dataset to the abstract and introduction. (lines 8 & 64)
5. L68 “it contains 24 925 of the 25 382 cluster plots” what happened to the 467 plots not included? Please explain why these were not included in the analysis.  
 Response: We excluded plots that contained only trees below the canopy layer or plots where the field inventory was carried out in a non-standard way (e.g. the sampling positions were south-west instead of north-east from the tract location or GNSS positions underwent custom post-processing). We added this information to the text under ”Study area and national forest inventory” (line 69).
6. L70 I assume scientific species names should be in italics “*Pinus sylvestris*” also please use the full English name of the species “Scots pine” and “Norway spruce” or synonyms.  
 Response: We switched all occurrences of botanic names to italics and adapted the common names as requested.
7. L73 Could give some references about forest disturbances in Germany since 2018 after “forest has likely decreased” such as: <https://doi.org/10.1093/forestry/cpae038> and <https://doi.org/10.3390/rs15174234>  
 Response: We added three citations, including the suggested ones and clarified that the growing stock has decreased, not the forest area. The affected areas almost always remain forest (line 75).
8. L92 “we can remove trees that are probably not visible from above by a heuristic.” A heuristic what? Function? Argument”?  
 Response: We changed this to ”a heuristic algorithm” (line 104).
9. L94 “the biggest (area-wise)” what is meant by area-wise? Crown area or basal area or something else?  
 Response: We changed this to ”in terms of basal area” (line 105).
10. Figure 5 shows polygon circles representing “modelled tree crowns” but I cannot find in the text how these were modelled. Please explain in detail how this was done because it is a critical part of the analysis. Was crown area measured in the field for each tree? If yes, how was this measured?  
 Response: The crown width is not measured in the field by the NFI. Therefore, we modeled the space occupied by a tree, its growing space, according to the official species-specific empirical NFI models (see Riedel, 2017, pp. 39-40), using the parameters and models described therein. According to Riedel et al. (2017) the growing space ”corresponds approximately to the crown projection area” (our translation). We added two explanatory sentences to the section ”NFI reference data selection” (line 98), clarifying what exactly was modeled, and added the equation and parameter table to the appendix.
11. L127 “Every date was randomly shifted by up to three days.” Why was this done?  
 Response: This was done to reduce the risk of reverse-engineering of the exact NFI plot locations.
12. L146 Please specify the brand and model of the ultrasonic device.  
 Response: Distances are measured using the Haglöf Vertex 3 or 4 ultrasonic device. In edge cases, distances are measured using a measuring tape. This information was also added to the text (line 86).
13. L162-163 Please adapt to the species naming guidelines of the journal (I assume species scientific names should be in italics)  
 Response: Done.

- Figure 7 might be a nice addition to show two panels: a) species distribution of all trees in the NFI and b) species distribution of trees extracted from the NFI. Also in this figure, please use italics for scientific species names.

Response: We combined both distributions in one plot and now present the original distribution in the background.

- L166 “coniferous vs deciduous” is not a useful distinction, you can have coniferous trees that are also deciduous (e.g. *Larix*). Deciduous says something about the leaf phenology while coniferous says something about the phylogeny (conifers being a subset of gymnosperms) which are not mutual exclusive or useful groups to make in this study. It would be much more useful to refer to “broadleaved deciduous” and “evergreen needleleaf” or in the case of larch to “deciduous needleleaf”. Furthermore, the common holly (*Ilex aquifolium*) can also grow to tree size but is an “broadleaved evergreen” tree/shrub. Could be nice to add some columns to the dataset providing data on the leaf phenology (deciduous/evergreen), leaf shape (needle/broadleaf) and phylogeny (e.g. plant family).

Response: We changed all occurrences of “deciduous” to “broadleaf”. However, we did not add a new column to the dataset, as this can easily be done by the data users according to their specific needs. All trees with a species code below 100 are coniferous, which we expect is enough distinction for a start.

- L179 “Figure 10 shows the total observation count over time.” Make clear what observations these are, images, pixels, trees?

Response: The observations refer to trees. The figure displays how often a tree was observed by a satellite image within a month, summed up across all trees. We added an explanatory sentence (line 190) and adapted the figure caption.

- L190-L195 the text and the panels in Figure 12 are not in the same order, please change the order in either the text or the figure and label the panels in Figure 12 (a,b,c,d) and refer to the panels in the text.

Response: We changed the order of figures and added sub-labels that are referenced in the text.

- Table A3 & A4 Please adapt to the species naming guidelines of the journal (I assume species scientific names should be in italics)

Response: Done.

## 2 Reviewer 2

### 2.1 Major comments

- The dataset does not adhere to current practices for pixel-level training data. Typically, individual pixels or pixel blocks are selected and labeled based on the dominant tree species, forest type, or proportions of tree species (based on basal area). This method has been used in previous studies mapping tree species (as cited by the authors) and it is common practice when mapping land cover as well. The authors do not follow this approach. Instead, they select trees from the forest inventory and then extract Sentinel-2 pixels corresponding to each tree. Since trees are much smaller than the 10x10 and 20x20 meter Sentinel-2 pixels, this results in many duplicate pixels in the sample. In homogeneous field plots, pixel values and labels are replicated because many trees occupy the same pixel. In mixed species plots, pixels are replicated, and the same value is associated with different tree species. I have not encountered a study using such a sample for tree species classification, and the authors do not demonstrate the utility of this dataset. I believe pixel replication can potentially bias model training and error estimation. Therefore, I strongly suggest the authors follow current practices. For example, the authors could provide for each subplot: average reflectance, basal area proportions by tree species, crown area proportions by tree species, and/or other tree statistics.

Response: We acknowledge that the common approach typically involves labeling individual pixels or pixel blocks based on dominant species or proportions. The plot design of the German NFI uses Bitterlich sampling (angle count sampling), which does not select all trees in a defined area (such as a Sentinel-2 pixel). Thus, assigning a species label to a fixed area using Bitterlich sampling data would also result in inaccuracies. We tried to use aerial images to derive a full area classification, however the image quality in Germany is not yet at a level that allows accurate enough detection. The only exemption could be single-species plots, where one can define a radius within which all trees belong to the same species with certainty. In the sampling design suggested by the reviewer, one would assign a species composition to one or more pixel(s) and train a classifier to predict exactly this composition. In our design, the classifier would predict the probability that a certain pixel is of a certain species, which is a different

information. But we expect that it is closely related and finally yields the same results if the number of training instances is large enough. We agree that our approach can generate duplicate pixels. However, we have now checked the dataset for duplicates in the bottom of atmosphere reflectances of the tree records. We grouped the dataset by tract id, corner id, time and reflectance values. If there were N identical reflectances per group, we counted N-1 as duplicates. In total, the dataset contains ca. 4.87 million duplicate entries in the tree data out of ca. 66 million, which is 7.38%. Out of these 4.87 M duplicates, 3.86 M (5.84%) were duplicates with identical species label and 1.01 M (1.53%) had differing species labels. Ergo, at least 0.77% ( $1.01 \text{ M} / 66 \text{ M} / 2$ ) of the labels are erroneous. While having duplicates in the dataset is far from ideal, we expect this amount to be low enough as not to play a significant role when fitting machine learning models. For comparison: The widely used ImageNet dataset contains 14.2 M images, of which 1.2 M (8.5%) are duplicates and the LAION 400M dataset contains 60 M duplicated images (15%). To increase the transparency we extended the section "Mixed and duplicate pixels" in the discussion (line 265) to make this issue clear to the users. We also added methodological clarifications in the section "Time series extraction and data processing" (line 123) which now starts with a paragraph that contrasts the "traditional" approach with the one we chose and the conclusions now contain a sentence encouraging the user to recombine the data in new ways as appropriate to their needs (line 305). The German NFI was originally not designed as a reference dataset for remote sensing-based classifications but to provide statistically sound estimates efficiently. Despite deviations from common practices, the presented dataset still remains the largest single-tree dataset available in Germany. Therefore, we think that our reference dataset, even if not structured according to the common approach, is an important and valuable contribution to the remote sensing community.

2. The authors add random noise to the pixel reflectance to make the field plot locations untraceable. I understand that. However, the authors do not show a sensitivity analysis of the effect of adding noise. I would encourage the authors to test this effect on mapping accuracy. More generally, the authors could demonstrate the utility of their dataset for mapping tree species. The separability analysis is not really useful for map developers.

Response: The scope of this manuscript is to present the dataset itself and not the derived products, like a tree species map. There are many options how it could be used for map creation and the publication will empower the users to develop their own methods and research. Regarding the added noise: This is a requirement by the data owner who will not release the exact coordinates of the NFI plots. This is common practice for NFIs in Europe. However, we tested the performance of neural networks trained on noisy data, applied to non-randomized data. We conducted three training runs on the published dataset and an internal, "clean" version, classifying 13 tree species. The average accuracy for the runs on the noisy data was 76.1% and for the "clean" data 76%. In both cases, all training runs reached accuracies of  $76 \pm 0.3\%$  (min/max). Therefore, we couldn't observe a drop in accuracy by adding 5% noise. But lastly, these values can only serve as rough estimate, as the actual susceptibility to noise depends on the model used. Regarding the separability analysis: this part might not be useful for map developers, but presents another aspect of the data (the reflectance distribution), so we kept it. However, we refactored the analysis as requested and split it into methods, results and discussion.

3. The writing could be improved with careful editing.

Response: We carefully reviewed and improved the text as described in the detailed responses to the reviewer comments. We also corrected typos and other errors.

## 2.2 Minor comments

1. L12: Avoid single-sentence paragraphs. Remove. Readers already got that information from the abstract.

Response: We removed the first sentence.

2. L19: traditional? Do you mean field information? I wouldn't term field inventories traditional. Both are needed.

Response: We changed "traditional [...] approaches" to "ground-based [...] approaches" (line 151).

3. L23: Extensive use?

Response: Changed "extensive" to "application [...] to large areas" (line 21).

4. L62: It is not possible to measure the reflectance of individual trees with Sentinel-2 data due to the spatial resolution. Sentinel-2 pixels represent a mixture of multiple tree canopies and background reflectance.

Response: We refer to our answer to the comment on L115 below.

5. L73: Area of stocked forest → forested area (as opposed to forest area)  
Response: Changed as requested.
6. L81: Please also specify the basal area factors associated with these radii.  
Response: We added that these radii correspond to BAF 4, 2 and 1 (lines 84, 90).
7. Fig 1. A figure of the sampling density by federal state would be more helpful. It is not possible to see the grid anyway  
Response: We added the state borders to the map, but did not switch to presenting the sampling density. Depicting the points directly allows the reader to locate high density areas, e.g. the Harz mountains.
8. L85: Please clarify what you mean with "subset of tree species labels". Is a label referring to pixels overlaying the angle count plot with BAF 4? Also, be specific about what you did and what can be done, e.g., "This information was used to label..." rather than "This... allows..."  
Response: A "label" refers to the information attached to pixel values that were extracted for each individual tree. We now state that the information on stand purity is included in the database, so it *can* be used to filter based on that criterion. We removed the sentence quoted last (line 92).
9. L90: stand area: you mean crown area?  
Response: We actually modeled the growing space. According to the source of the used model (Riedel et al., 2017) the growing space "corresponds approximately to the crown projection area" (our translation), so there should be no significant differences. We added a clarifying sentence (line 100).
10. L90: It is unclear (at this point) why you remove trees. In the previous section, you describe that you identify single-species stands. If you are removing trees in mixed stands, I wonder if your method tends to underestimate conifer trees, since their crown area is usually smaller and the crowns of the surrounding broadleaf trees are more flexible.  
Response: We now start the section "NFI reference data selection" (line 94) by explaining why we remove trees. Regarding the underestimation of conifer trees: We updated Figure 7 to also show the original NFI counts. In most cases, around 75% of the trees are retained and we do not notice a preference for broadleaf trees.
11. L92: same here. Write "...we removed trees..." rather than "...we can remove trees..."  
Response: Changed as requested.
12. L93: Use past tense consistently to describe what you did.  
Response: Changed as requested.
13. L96: Doesn't the forest inventory sampling design include non-forest observations? There are advantages with staying within a single sampling design.  
Response: The NFI does not visit non-forest sample points in the field. In principle we could stay within the same grid and sample from non-forest locations but initially we had only data for the patches with forest plots available. Overall there would be ca 190,000 cluster plots, which would increase the time it takes to extract the data and the storage requirements. We thus opted to sample in the extracted 300m x 300m patches. This could bias the non-tree samples towards agricultural land. We added a discussion section regarding this possible bias (line 252).
14. L96: comma in front of ", we added..."  
Response: Changed as requested.
15. L114: I am still confused by your wording. It sounds like you are extracting pixels associated with individual trees. You probably mean "when the projected tree crowns from the plot covered more than a single Sentinel-2 pixel,..."? Please clarify what your spatial unit in the field is. It is probably the subplot and not individual trees, i.e., you obtain a single reflectance measure for each subplot and S2 image.  
Response: We are indeed extracting the time series for each tree and changed the sentence from "extracted ... at the respective reference data position" to "extracted ... at each tree position" to make that clearer (line 133).

16. L115: Fair enough, but you are trying to be more precise than the data, considering that Sentinel-2 also has 20-m bands and the geolocation accuracy of the NFI and Sentinel-2.

Response: We understand your concern and yes, this is at the edge of what is currently possible. For exactly this reason we are using the FORCE processing pipeline that aligns the S2 images with Landsat time series and thereby improves their geolocation accuracy. The approximate geolocation error of the satellite images is 8m at the 80% confidence level and the GNSS error amounts to 5m at the same confidence level. Computing the correct combined error is not trivial, as at least the GNSS error distribution is Non-Gaussian. Assuming Gaussian distribution, the combined error amounts to 9.4m. This is below the 10m pixel size, so extracted values should reasonably represent the targeted trees. We added a new paragraph to the discussion, treating the combined error (line 238). With the publication of Sentinel-2 Collection 1 (<https://sentinels.copernicus.eu/web/sentinel/sentinel-data-access/sentinel-products/sentinel-2-data-products/collection-1-level-2a>) the spatial accuracy of the source images will be further improved. The latest data quality report (<https://sentiwiki.copernicus.eu/attachments/1673423/OMPC.CS.DQR.001.06-2024%20-%20MSI%20L1C%20DQR%20July%202024%20-%20101.0.pdf?inst-v=7071b3cb-abd4-4add-b2c2-d6e89a0d956a>) mentions an absolute geolocation accuracy of 8.56m for S2-A and 8.18m for S2-B at the 95% confidence level. We consider using S2 Collection 1 images for future database updates.

17. L124: Ok. You do seem to extract S2 reflectance values for each tree. What is the rationale and use case behind it? An S2 pixel is a mixture of different surface types including different trees, understory and other background. For tree species mapping, we are usually interested in modeling the relationship between such mixed signal either with the dominant tree species, a forest type category, or fractions of trees species. Attempting to link individual trees with Sentinel-2 is uncommon. As a result, you will produce multiple replicates of the same pixel or 3x3 pixel group and associate them with multiple trees of the same or multiple species.

Response: We kindly refer to our response to major comment one.

18. L125: I recommend to document your data in a table format. A table could show the field name of in your dataset along with a description.

Response: Changed as requested. We replaced the enumeration by a table.

19. L142: Because you replicate pixels of subplot, your data still contains auto-correlated samples. There is also spatial autocorrelation within cluster plots. Do you have a recommendation how users can deal with the autocorrelation associated with cluster plots?

Response: Yes, the autocorrelation increases with decreasing distance and positions within a subplot are close to each other. This is a general property of the underlying satellite data, independent from the method used to extract samples / pixels. So the method we used for extracting the pixels amplifies the already existing autocorrelation level. One option to deal with correlated samples would be to group the data by subplot, compute the correlation (e.g. using the time series), and remove samples that correlate beyond a certain threshold. This should effectively remove duplicated samples. We added this suggestion to the discussion section (line 272).

20. Figure 7: Why does the x-axis (count) only go up to 110? How does this correspond to your 350,000 trees and/or 25,000 cluster plots?

Response: The axes represents thousands, which we depicted by "k". We switched the axis label to "count in thousands" and slightly altered the plot on request of reviewer 1.

21. Figure 12: Please replace "Samples per 100km<sup>2</sup>" with a more meaningful unit, e.g. trees per ha or tree species proportion.

Response: We switched to samples per km<sup>2</sup>.

22. 4.5 This section reports new results but is presented in the Discussion section.

Response: We restructured the section into Methods - Results - Discussion.
